# Supplementary material for: Survey of Telemedicine by Pediatric Nephrologists During the COVID-19 Pandemic
Source: PubMed Central journal article supplement — Kidney Int Rep. 2021 Jul 7;6(9):2316–22. doi: 10.1016/j.ekir.2021.06.026 (PMC8419113; doi:10.1016/j.ekir.2021.06.026), 2021-07-07
Supplement: mmc1.pdf [file mmc1.pdf]

Supplemental information

**Supplemental Table**

**Supplemental Table 1 : Physician Survey Questions**

| Number | Question                                                                                      | Answer Choices  |            |         |                         |                   |
|--------|-----------------------------------------------------------------------------------------------|-----------------|------------|---------|-------------------------|-------------------|
| 1      | How has your overall experience with telemedicine been?                                       | Very Satisfied  | Satisfied  | Neutral | Dissatisfied            | Very Dissatisfied |
| 2      | Were you provided training from the hospital on utilizing telehealth services?                | Yes             | No         |         |                         |                   |
| 3      | If you said yes to the previous question, what type of training did you receive?              | Fill in integer |            |         |                         |                   |
| 4      | What mode of telehealth did you utilize?                                                      | Telephone       | Video chat | Both    | Other (fill in integer) |                   |
| 5      | For what percentage of patients did you utilize telemedicine using video chat vs. audio only? | Fill in integer |            |         |                         |                   |

|    |                                                                                                       |                 |           |              |              |                   |
|----|-------------------------------------------------------------------------------------------------------|-----------------|-----------|--------------|--------------|-------------------|
| 6  | Which of the following services did you utilize to engage in Telemedicine?                            | Doxy.me         | eVisit    | Simple Visit | VSee         | Other (box)       |
| 7  | How would you rate the overall clinical experience that you were able to provide?                     | Very Satisfied  | Satisfied | Neutral      | Dissatisfied | Very Dissatisfied |
| 8  | Were you able to utilize the billing codes for telemedicine?                                          | Yes             | No        | N/A          |              |                   |
| 9  | What were your patient turnouts for telehealth in comparison to regular consultations?                | More            | Similar   | Less         |              |                   |
| 10 | What challenges have you faced with telemedicine?                                                     | Fill in Integer |           |              |              |                   |
| 11 | What resources could your clinic/hospital provide to improve the effectiveness of your appointments ? | Fill in integer |           |              |              |                   |

|    |                                                          |                 |  |  |  |  |
|----|----------------------------------------------------------|-----------------|--|--|--|--|
| 12 | How are your telemedicine services marketed to patients? | Fill in integer |  |  |  |  |
|----|----------------------------------------------------------|-----------------|--|--|--|--|

**Supplemental Table 2: Patient Survey Questions**

| Number | Answer Choices                                                                      |                         |               |                        |
|--------|-------------------------------------------------------------------------------------|-------------------------|---------------|------------------------|
| 1      | Do not need assistance while using the system                                       | Agree                   | Disagree      |                        |
| 2      | See my HCP as if we met in person                                                   | Agree                   | Disagree      |                        |
| 3      | Obtain better access to health-care services by use of telemedicine                 | Agree                   | Disagree      |                        |
| 4      | Find telemedicine an acceptable way to receive health-care services                 | Agree                   | Disagree      |                        |
| 5      | Meet with my HCP more frequently via telemedicine                                   | Agree                   | Disagree      |                        |
| 6      | Will use telemedicine services again                                                | Agree                   | Disagree      |                        |
| 7      | Easily talk to my HCP                                                               | Agree                   | Disagree      |                        |
| 8      | Overall, I am satisfied with the quality of service being provided via telemedicine | Agree                   | Disagree      |                        |
| 9      | Telemedicine provides for my health-care need                                       | Agree                   | Disagree      |                        |
| 10     | Hear my HCP clearly                                                                 | Agree                   | Disagree      |                        |
| 11     | Feel comfortable communicating with my HCP                                          | Agree                   | Disagree      |                        |
| 12     | Telemedicine saves me time travelling to hospital or a specialist clinic            | Agree                   | Disagree      |                        |
| 13     | Think the healthcare provided via telemedicine is consistent                        | Agree                   | Disagree      |                        |
| 14     | Do receive adequate attention                                                       | Agree                   | Disagree      |                        |
| 15     | HCP is able to understand my healthcare condition                                   | Agree                   | Disagree      |                        |
| 16     | Travel time to the visit                                                            | Virtual Visit is Better | No difference | Office Visit is better |
| 17     | Finding a convenient time for visit                                                 | Virtual Visit is Better | No difference | Office Visit is better |
| 18     | Amount of time I wait for my clinician                                              | Virtual Visit is Better | No difference | Office Visit is better |
| 19     | Comfort I feel sharing personal or private information                              | Virtual Visit is Better | No difference | Office Visit is better |
| 20     | Confidence health concern can be taken care of                                      | Virtual Visit is Better | No difference | Office Visit is better |
| 21     | Cost of the visit                                                                   | Virtual Visit is Better | No difference | Office Visit is better |
| 22     | Overall quality of the visit                                                        | Virtual Visit is Better | No difference | Office Visit is better |
